# Supplementary material for: Improved Production of Recombinant Carboxylesterase FumDM by Co-Expressing Molecular Chaperones in Pichia pastoris
Source: MDPI journal article supplement (doi:10.3390/toxins15020156), 2023-02-14
Supplement: s1 [file s1]

## Supplementary Materials

### Supplementary figures

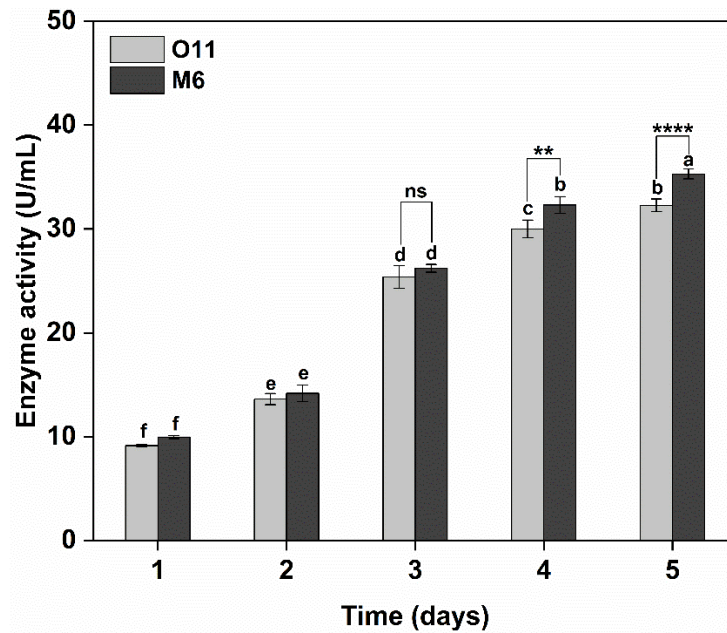

Figure S1. Enzyme activities of recombinant strains GS115-FumDO and GS115-FumDM from 1st day to 5th day.

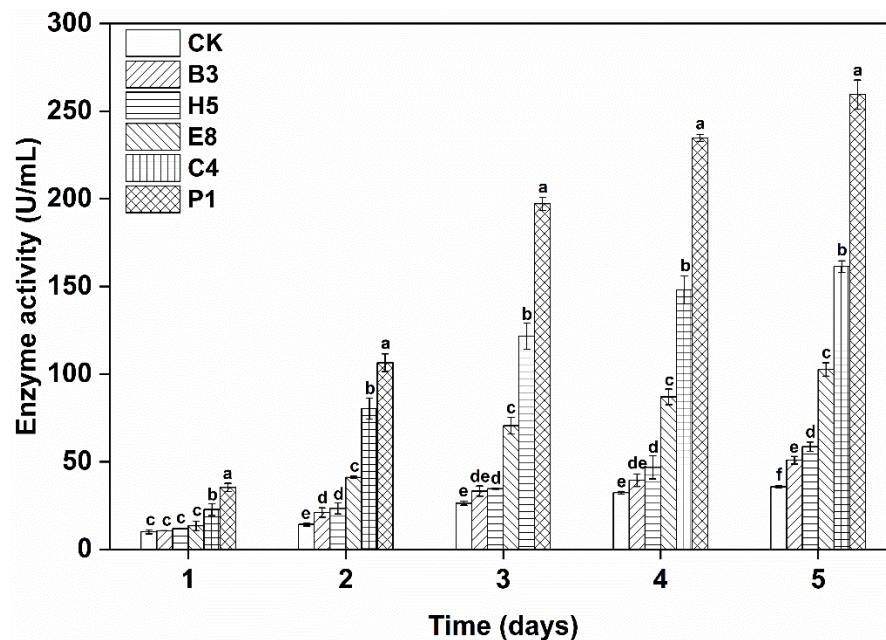

Figure S2. Enzyme activities of recombinant strains co-expressing of molecular chaperones from 1st day to 5th day.

## Supplementary tables

**Table S1.** Summary of sequencing data quality.

| Samples | Clean reads | Clean Bases   | GC Content | %≥Q30 |
|---------|-------------|---------------|------------|-------|
| CK-1    | 20,203,621  | 6,049,706,214 | 43.98      | 94.94 |
| CK-2    | 20,463,812  | 6,126,982,398 | 44.00      | 94.67 |
| CK-3    | 25,828,645  | 7,731,982,152 | 44.23      | 95.62 |
| CP-1    | 20,685,957  | 6,192,743,110 | 43.90      | 94.49 |
| CP-2    | 20,431,706  | 6,119,436,324 | 43.95      | 94.32 |
| CP-3    | 20,624,434  | 6,176,530,034 | 43.85      | 94.69 |
| PD-1    | 20,744,156  | 6,212,332,468 | 43.96      | 94.06 |
| PD-2    | 20,219,890  | 6,055,103,224 | 44.01      | 94.38 |
| PD-3    | 19,384,889  | 5,804,669,746 | 43.95      | 93.59 |

**Table S2.** Transcriptional up-regulated genes in PD group.

| GO Class | GO ID      | GO Term                              | Query ID        | Description                                                           | Log <sub>2</sub> FC |
|----------|------------|--------------------------------------|-----------------|-----------------------------------------------------------------------|---------------------|
| MF       | GO:0003756 | protein disulfide isomerase activity | PAS_chr4_0844   | Protein disulfide isomerase/ <i>PDI</i>                               | 2.19                |
| MF       | GO:0016491 | oxidoreductase activity              | PAS_chr3_0053   | C-4 methyl sterol oxidase/ <i>ERG25</i>                               | 1.28                |
| MF       | GO:0003700 | transcription factor activity        | PAS_chr1-1_0381 | transcriptional activator HAC1                                        | 1.01                |
| MF       | GO:0005524 | ATP binding                          | PAS_chr3_0365   | Mitochondrial matrix ATPase                                           | 1.23                |
| MF       | GO:0005515 | protein binding                      | PAS_chr2-1_0490 | glutathione S-transferase/ <i>gst2</i>                                | 1.02                |
| MF       | GO:0022857 | transmembrane transporter activity   | PAS_chr1-3_0017 | High-affinity cysteine-specific transporter                           | 0.96                |
| MF       | GO:0051082 | unfolded protein binding             | PAS_chr2-2_0151 | Type II Hsp40 co-chaperone that interacts with the Hsp70 protein Ssa1 | 0.94                |
| MF       | GO:0003955 | NAD(P)H dehydrogenase (quinone)      | PAS_chr1-1_0449 | NAD(P)H dehydrogenase (quinone)                                       | 1.29                |

|    |            |                                             |                 |                                                                                                         |      |
|----|------------|---------------------------------------------|-----------------|---------------------------------------------------------------------------------------------------------|------|
|    |            | activity                                    |                 |                                                                                                         |      |
| MF | GO:0016853 | isomerase activity                          | PAS_chr4_0198   | C-8 sterol isomerase/ <i>ERG2</i>                                                                       | 1.07 |
| BP | GO:0050896 | response to stimulus                        | PAS_chr2-1_0723 | Transcriptional activator, zinc finger protein/ <i>Msn2</i>                                             | 1.49 |
| BP | GO:0065007 | biological regulation                       | PAS_chr3_0092   | transcriptional enhancer factor                                                                         | 1.36 |
| BP | GO:0008610 | lipid biosynthetic process                  | PAS_chr1-4_0367 | C-5 sterol desaturase/ <i>ERG3</i>                                                                      | 1.52 |
| BP | GO:0045332 | phospholipid translocation                  | PAS_chr4_0430   | Cell division control protein 50/ <i>Cdc50</i>                                                          | 1.12 |
| BP | GO:0006457 | protein folding                             | PAS_chr3_0230   | Hsp70 protein involved in protein folding and the response to stress                                    | 1.15 |
| BP | GO:0042026 | protein refolding                           | PAS_chr4_0158   | chaperonin GroEL, Tetradecameric mitochondrial chaperonin                                               | 1.15 |
| BP | GO:0043248 | proteasome assembly                         | PAS_chr4_0761   | proteasome component ECM29                                                                              | 1.31 |
| BP | GO:0006636 | unsaturated fatty acid biosynthetic process | PAS_chr2-1_0072 | Delta(9) fatty acid desaturase/ <i>OLE1</i>                                                             | 1.11 |
| BP | GO:0051920 | cell redox homeostasis                      | PAS_chr2-1_0502 | Thiol-specific peroxiredoxin/ <i>PRDX5</i> , reduces hydroperoxides to protect against oxidative damage | 1.09 |
| CC | GO:0005789 | endoplasmic reticulum membrane              | PAS_chr2-1_0038 | ER transmembrane protein/ <i>Bap31</i>                                                                  | 1.30 |
| CC | GO:0016021 | integral component of membrane              | PAS_chr4_0784   | aquaglyceroporin related protein, channel-like protein                                                  | 0.99 |

**Note: All the transcriptional up-regulated genes shown in the table were ranked by p-value with  $p \leq 0.001$ .**

**Table S3.** Transcriptional up-regulated genes in CP group.

| GO Class | GO ID      | GO Term                                      | Query ID        | Description                                                   | Log <sub>2</sub> FC |
|----------|------------|----------------------------------------------|-----------------|---------------------------------------------------------------|---------------------|
| MF       | GO:0003755 | peptidyl-prolyl cis-trans isomerase activity | PAS_chr1-1_0267 | Peptidyl-prolyl cis-trans isomerase (cyclophilin)/ <i>PPI</i> | 5.73                |
| MF       | GO:0003955 | NAD(P)H dehydrogenase (quinone) activity     | PAS_chr1-1_0449 | NAD(P)H dehydrogenase (quinone)                               | 1.71                |
| MF       | GO:0003700 | transcription factor activity                | PAS_chr1-1_0381 | transcriptional activator HAC1                                | 0.60                |
| MF       | GO:0035091 | phosphatidylinositol binding                 | PAS_chr2-1_0389 | Sorting nexin                                                 | 0.61                |
| MF       | GO:0016301 | kinase activity                              | PAS_chr4_0678   | Chitin synthase regulatory factor 3/ <i>chr3</i>              | 0.65                |
| MF       | GO:0016853 | isomerase activity                           | PAS_chr4_0198   | C-8 sterol isomerase/ <i>ERG2</i>                             | 0.91                |
| MF       | GO:0008237 | metallopeptidase activity                    | PAS_chr3_0517   | peptidase family                                              | 0.62                |
| MF       | GO:0003676 | nucleic acid binding                         | PAS_chr1-1_0386 | Polynucleotide kinase 3 phosphatase                           | 0.62                |
| BP       | GO:0034599 | cellular response to oxidative stress        | PAS_chr2-1_0640 | nitroreductase/ <i>HBN1</i>                                   | 1.35                |

|    |            |                                    |                 |                                                                                   |      |
|----|------------|------------------------------------|-----------------|-----------------------------------------------------------------------------------|------|
| BP | GO:0045332 | phospholipid translocation         | PAS_chr4_0430   | Cell division control protein 50/ <i>Cdc50</i>                                    | 0.70 |
| BP | GO:0016570 | histone modification               | PAS_chr4_0902   | RNA polymerase II-associated protein                                              | 0.61 |
| BP | GO:0006635 | fatty acid beta-oxidation          | PAS_chr1-4_0538 | Fatty-acyl coenzyme A oxidase                                                     | 0.64 |
| BP | GO:0016070 | RNA metabolic process              | PAS_chr1-3_0151 | Nucleolar protein required for normal metabolism of the rRNA primary transcript   | 0.85 |
| BP | GO:0006421 | asparaginyl-tRNA aminoacylation    | PAS_chr1-1_0392 | Mitochondrial asparaginyl-tRNA synthetase                                         | 0.60 |
| BP | GO:0045727 | positive regulation of translation | PAS_chr1-4_0230 | translation elongation factor GUF1                                                | 0.69 |
| BP | GO:0000003 | reproduction                       | PAS_chr2-2_0013 | Subunit of a replication-pausing checkpoint complex (Tof1p-Mrc1p-Csm3p)           | 0.67 |
| CC | GO:0005576 | extracellular region               | PAS_chr3_0076   | Cysteine-rich secretory protein family                                            | 0.77 |
| CC | GO:0005759 | mitochondrial matrix               | PAS_chr4_0755   | Mitochondrial glycoprotein                                                        | 0.68 |
| CC | GO:0016020 | membrane                           | PAS_chr1-1_0085 | Membrane-associating domain                                                       | 0.63 |
| CC | GO:0005743 | mitochondrial inner membrane       | PAS_chr3_0880   | Mitochondrial inner membrane protein required for normal mitochondrial morphology | 0.65 |

**Note: All the transcriptional up-regulated genes shown in the table were ranked by p-value with  $p \leq 0.001$ , except that p-value of mitochondrial inner membrane (GO: 0005743) was less than 0.05 ( $p \leq 0.05$ ).**

**Table S4.** Information table of qRT-PCR validation of differentially expressed genes

| Gene Name    | Encoding related proteins                           | Forward primer (5' to 3') | Reverse primer (5' to 3') |
|--------------|-----------------------------------------------------|---------------------------|---------------------------|
| <i>GAPDH</i> | glyceraldehyde-3-phosphate dehydrogenase (GAP) gene | ATGGAGCAGTGATGACGACC      | GCTGGTGTCTCGACTACGTCAT    |
| <i>PDI</i>   | protein disulfide isomerase                         | TCTTCAAGCTAGTCGGAAAG      | CCTCATAAGCAGGAGCCATT      |
| <i>PPI</i>   | peptidyl-prolyl cis-trans isomerase (cyclophilin)   | ACTTCAAACCTCAAGCACGAT     | ACGACATAGCCAAAGACAAC      |
| <i>Hsp70</i> | heat shock 70kDa protein                            | GTCCATCAACCCAGACGAAG      | TAGAGGAGCAACATCCAGCA      |
| <i>UBE3C</i> | ubiquitin-protein ligase E3 C                       | CCTTCAACCCAGAGGGACAT      | CACCGATTGCACAAGTAGCC      |
| <i>Msn2</i>  | zinc finger protein Msn2                            | CTTTGATTACGAACGGGATT      | GAGGCTGATGCTGAGACG        |

---

|              |                                |                      |                      |
|--------------|--------------------------------|----------------------|----------------------|
| <i>PRDX5</i> | thiol-specific peroxiredoxin   | TGCCTGGAAGAAGACATTG  | GTGGATGAAATCACCCCTTA |
| <i>ERG3</i>  | C-5 sterol desaturase          | CAATCACCCAAGATACCTCA | TATCCACGCAACTCAATCAA |
| <i>OLE1</i>  | delta(9) fatty acid desaturase | GGGGTGGATTTATCTACGG  | GGTGTCTCCTCTGTCATCG  |

---
